# Supplementary material for: Accelerating the Biodegradation of High-Density Polyethylene (HDPE) Using Bjerkandera adusta TBB-03 and Lignocellulose Substrates
Source: PubMed Central journal article supplement (PMC6780323; doi:10.3390/microorganisms7090304), 2019-08-31
Supplement: microorganisms-07-00304-s001.pdf [file microorganisms-07-00304-s001.pdf]

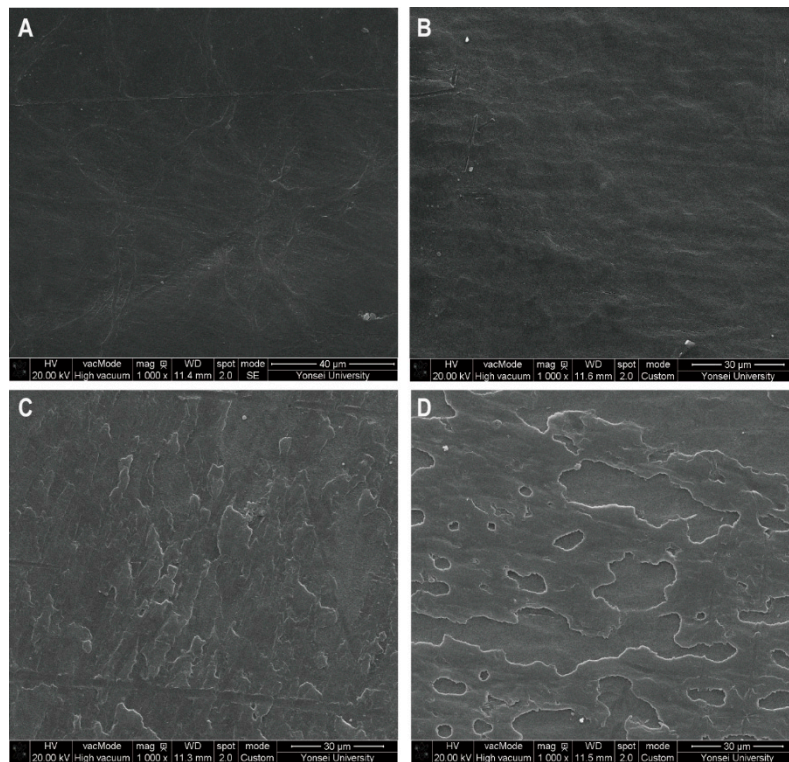

**Figure S1.** SEM micrographs of control and treated HDPE samples at 1,000× magnification. (A) Control, (B) ME, (C) LM, and (D) SSF.
